# Supplementary material for: Endocrine Autoimmune Disease as a Fragility of Immune Surveillance against Hypersecreting Mutants
Source: PubMed Central journal article supplement (PMC7237888; doi:10.1016/j.immuni.2020.04.022), 2020-05-19
Supplement: mmc1.pdf [file mmc1.pdf]

**Immunity, Volume 52**

**Supplemental Information**

**Endocrine Autoimmune Disease as a Fragility of  
Immune Surveillance against Hypersecreting Mutants**

**Yael Korem Kohanim, Avichai Tendler, Avi Mayo, Nir Friedman, and Uri Alon**

**Supplemental Information**

Tables S1-S3

**Table S1: Endocrine autoimmune diseases. Related to Figure 1.**

| <b>Autoimmune Disease</b>         | <b>Cells</b>                     | <b>Prevalence of AID</b>                                | <b>Input</b> | <b>Secreted factor</b> | <b>Auto-antigens</b>                                    | <b>Role of autoantigen*</b>                                                                | <b>Prevalence of disease of hypersecreting mutant expansion</b>      |
|-----------------------------------|----------------------------------|---------------------------------------------------------|--------------|------------------------|---------------------------------------------------------|--------------------------------------------------------------------------------------------|----------------------------------------------------------------------|
| Type-1 Diabetes                   | Pancreatic beta cells            | 0.1-1% (Cooper and Stroehla, 2003; Cooper et al., 2009) | glucose      | Insulin                | Insulin                                                 | Insulin                                                                                    | Insulinoma, ~0.01% (Service et al., 1991)                            |
|                                   |                                  |                                                         |              |                        | Preproinsulin (PPI)                                     | Insulin precursor                                                                          |                                                                      |
|                                   |                                  |                                                         |              |                        | Protein Tyrosine Phosphatase, Receptor Type N (PTPRN)   | Insulin storage and secretion (Harashima et al., 2012; Saeki et al., 2002)                 |                                                                      |
|                                   |                                  |                                                         |              |                        | Protein Tyrosine Phosphatase, Receptor Type N2 (PTPRN2) | Insulin secretion regulation (Cai et al., 2011; Doi et al., 2006)                          |                                                                      |
|                                   |                                  |                                                         |              |                        | Islet cell antigen-69 (ICA69)                           | transport of insulin secretory granules (Buffa et al., 2008)                               |                                                                      |
|                                   |                                  |                                                         |              |                        | Zinc transporter 8 (ZnT8)                               | Insulin production, storage, and secretion (Chimienti et al., 2006; Davidson et al., 2014) |                                                                      |
|                                   |                                  |                                                         |              |                        | Glutamic decarboxylase 65 (GAD65)                       | No known role in insulin secretion                                                         |                                                                      |
| Thyroiditis (Hashimoto's disease) | Thyroid gland cells (thyrocytes) | 0.1-1% (Cooper and Stroehla, 2003; Cooper et al., 2009) | TSH          | T4/ T3                 | Thyroid peroxidase (TPO)                                | T3/T4 biosynthesis (Ruf and Carayon, 2006)                                                 | Thyroid toxic adenoma (toxic nodule), ~0.5%-1% (Bürigi et al., 1998) |
|                                   |                                  |                                                         |              |                        | Thyroglobulin (Tg)                                      | T3/T4 precursor                                                                            |                                                                      |
| Addison's Disease                 | Adrenal cortex cells             | ~0.01% (Cooper and Stroehla, 2003; Cooper et al., 2009) | ACTH         | Cortisol/ aldosterone  | 21-hydroxylase (CYP21A2)                                | Cortisol/ aldosterone biosynthesis                                                         | Adrenal Cushing's syndrome, ~0.0008% (Castinetti et al., 2012)       |

|                           |                        |                                                                                                      |          |             |                                                                 |                                                        |   |
|---------------------------|------------------------|------------------------------------------------------------------------------------------------------|----------|-------------|-----------------------------------------------------------------|--------------------------------------------------------|---|
| Vitiligo                  | Melanocytes            | 0.1-1% (Cooper and Stroehla, 2003; Cooper et al., 2009; Krüger and Schallreuter, 2012)               | MSH      | Melanin     | Melanocyte protein PMEL                                         | Melanin synthesis and storage (Raposo and Marks, 2007) | ? |
|                           |                        |                                                                                                      |          |             | Protein melan-A (MART1)                                         |                                                        |   |
|                           |                        |                                                                                                      |          |             | Tyrosinase (TYR)                                                | Melanin synthesis (Lai et al., 2018)                   |   |
|                           |                        |                                                                                                      |          |             | Tyrosinase related proteins 1 and 2                             |                                                        |   |
| Autoimmune gastritis      | Stomach parietal cells | 0.1-1% (Cooper and Stroehla, 2003; Cooper et al., 2009; Kulnigg-Dabsch, 2016; Minalyan et al., 2017) | Gastrin  | Acid        | Gastric H/K ATPase                                              | Acid production (Kulnigg-Dabsch, 2016)                 | ? |
| Primary biliary cirrhosis | Cholnagiocytes         | ~0.01% (Cooper and Stroehla, 2003; Cooper et al., 2009)                                              | Secretin | Bicarbonate | PDC-E2 ,E3BP components of pyruvate/oxo-glutarate dehydrogenase | Bicarbonate production (CO2)                           | ? |

\*Autoantigens are from: T1D: (Roep and Peakman, 2012) – T cell antigens. Hashimoto thyroiditis: (Chistiakov, 2005) – autoantibodies with evidence for T cell reactivity. Addison Disease: (Michels and Eisenbarth, 2010) – autoantibodies. Vitiligo (Richmond et al., 2013) – T cell antigens. Autoimmune gastritis: (Kulnigg-Dabsch, 2016), T cells antigen. PBC: (Lleo et al., 2014) – autoantibodies. ?- no clear corresponding disease.

**Table S2: Tissues that rarely get autoimmune diseases. Related to Figure 2.**

| Cells                        | Input          | Secreted factor | Autoimmune Disease            | Prevalence of autoimmune disease                                                                    | Hypersecreting mutant expansion disease              | Prevalence of hypersecreting mutant expansion disease |
|------------------------------|----------------|-----------------|-------------------------------|-----------------------------------------------------------------------------------------------------|------------------------------------------------------|-------------------------------------------------------|
| Parathyroid gland cells      | Calcium        | PTH             | Autoimmune hypoparathyroidism | 10 <sup>-3</sup> -10 <sup>-4</sup> % (Mostly as a part of autoimmune polyendocrine syndrome type 1) | Primary hyperparathyroidism                          | 0.1-1% (Yeh et al., 2013)                             |
| Alpha cells                  | Insulin        | Glucagon        | No known disease              | -                                                                                                   | Hyperglucagonemia                                    | ?                                                     |
| Kidney juxtaglomerular cells | Blood pressure | Renin           | No known disease              | -                                                                                                   | Renin-secreting juxtaglomerular cell tumor/ reninoma | ~0.01%*                                               |
| Corticotrophs                | CRH            | ACTH            | Autoimmune hypophysitis       | 0.0005% (Howlett et al., 2010)                                                                      | ACTH secreting adenoma                               | 1%**                                                  |
| Somatotrophs                 | GHRH           | GH              |                               |                                                                                                     | GH secreting adenoma                                 | 0.6%**                                                |
| Thyrotrophs                  | TRH            | TSH             |                               |                                                                                                     | TSH secreting adenoma                                | 0.1%**                                                |
| Lactotrophs                  | Dopamine, TRH  | Prolactin       |                               |                                                                                                     | Prolactin secreting adenoma                          | 9%**                                                  |
| Gonadotrophs                 | GnRH           | FSH, LH         |                               |                                                                                                     | Gonadotropin secreting adenoma                       | 0.3%**                                                |

\* Renin-secreting juxtaglomerular cell tumors are a rare cause for hypertension (Kuroda et al., 2011). Haab et al found that 8 out of 30,000 hypertensive patients at a hypertensive clinic had juxtaglomerular cell tumors (Haab et al., 1995). The prevalence of hypertension in the population is 29% ((Fryar et al., 2017), in the US). We thus roughly estimate the prevalence of juxtaglomerular cell tumors as  $0.29 \times 8 / 30,000$ .

\*\* Pituitary hormone secreting adenoma prevalence was calculated as follows: pituitary adenoma prevalence in the population is ~20% (Ezzat et al., 2004). McComb et al estimated on the basis of 107 studied adenomas that ~50% of the adenomas are hormone secreting (McComb et al., 1983), the vast majority of which are sub-clinical. About 43% secrete prolactin, 2.8% secrete GH, 4.9% secrete ACTH, 1.4% secrete LH, and 0.7% secrete TSH (Ezzat et al., 2004; McComb et al., 1983).

**Table S3: Autoimmune TCR  $\beta$ -chain CDR3 sequences are found in the public TCR repertoire of healthy individuals. Related to Methods.** Comparison between i. curated TCR sequences that recognize antigens identified in autoimmune diseases (Table S4, sequences were taken from the indicated references) and ii. Public TCR repertoire datasets that contain sequences that frequently appear in mice (for thyroglobulin) or in human (for the rest) (Table S5). Autoimmune TCR sequences that appear in the public repertoire dataset are listed here. Sequences that are public in both human and mouse are underlined. (Methods).

| Autoimmune disease      | Antigen            | TCR $\beta$ -chain CDR3 sequences in public dataset                                                                                                                                                                                                                                                                                                                                                                         | References                                                                                                                                                                                                                          |
|-------------------------|--------------------|-----------------------------------------------------------------------------------------------------------------------------------------------------------------------------------------------------------------------------------------------------------------------------------------------------------------------------------------------------------------------------------------------------------------------------|-------------------------------------------------------------------------------------------------------------------------------------------------------------------------------------------------------------------------------------|
| Hashimoto's thyroiditis | Thyroglobulin      | <u>CASSLGEQYF</u><br>CASSRDSSQNTLYF<br>CASSRDSYAEQFF<br>CASSRTNTEVFF                                                                                                                                                                                                                                                                                                                                                        | (Matsuoka et al., 1994)                                                                                                                                                                                                             |
| T1D                     | ZNT8               | CASSDQETQYF                                                                                                                                                                                                                                                                                                                                                                                                                 | (Culina et al., 2018)                                                                                                                                                                                                               |
|                         | Proinsulin         | CASSLERETQYF                                                                                                                                                                                                                                                                                                                                                                                                                | (Gomez-Tourino et al., 2017)                                                                                                                                                                                                        |
|                         | Islet autoreactive | CASSLVGGNEQFF                                                                                                                                                                                                                                                                                                                                                                                                               |                                                                                                                                                                                                                                     |
|                         | GAD65              | CASSELYEQYF CASSERETQYF<br>CASSLATYEQYF CASSLGDQPQHF<br>CASSLGGYGYTF<br>CASSLGLTDTQYF <u>CASSLQYEQYF</u><br>CASSLRAGELFF<br>CASSLTGELFF CASSPGGGYTF<br><u>CASSPTGYEQYF</u> CASSQGDYGYTF<br>CASSQGGGNQPQHF<br>CASSRQGTGELFF<br>CASSRTGYGYTF<br>CASSSGTVNTEAFF<br>CASSFSSGNTIYF<br>CASSLAMNTEAFF CASSLEGGYTF<br>CASSLGTSSYEQYF<br>CASSLQGTYEQYF<br>CASSLVGGNEQFF<br>CASSPGQGNTIYF<br>CASSPGTAGNTIYF<br>CASSQTDQYF CASSRGTEAFF |                                                                                                                                                                                                                                     |
| Vitiligo                | PMEL (gp100)       | <u>CASSLGSSYEQYF</u>                                                                                                                                                                                                                                                                                                                                                                                                        |                                                                                                                                                                                                                                     |
|                         | MART1 (MLANA)      | CASSNSYEQYF, CASSLGDTEAFF                                                                                                                                                                                                                                                                                                                                                                                                   | TCR sequences are from (Trautmann et al., 2002), through the VDJdb (Bagaev et al., 2020). These sequences are against the epitope ELAGIGILTV that was recognized as an autoantigen in vitiligo (Lang et al., 2001; Li et al., 2010) |
